# Supplementary material for: Light driven molecular lock comprises a Ru(bpy)2(hpip) complex and cucurbit[8]uril
Source: Royal Society of Chemistry journal article supplement (doi:10.1039/d0ra10940a), 2021-01-01
Supplement: d0ra10940a1.pdf [file d0ra10940a1.pdf]

## Supporting Information

# Light Driven Molecular Lock comprises Ru(bpy)<sub>2</sub>(hpip) complex and Cucurbit[8]uril

Xiaona Yang<sup>a,b</sup>, Jie Li<sup>†a</sup>, Song Jiang<sup>\*a</sup>, Puhui Xie<sup>a</sup>, Guoxing Liu<sup>a</sup>, Xin Zheng<sup>a</sup>, Zhanqi Cao<sup>a</sup>, Xianfu Zheng<sup>\*a</sup>, Dapeng Zou<sup>\*c</sup>, Yangjie Wu<sup>c</sup>

<sup>a</sup> The College of Science, Henan Agricultural University, Zhengzhou 450002, Henan, P. R. China

<sup>b</sup> Department of Basic, The PLA Information Engineering University, Zhengzhou 450002, Henan, P. R. China

<sup>c</sup> The College of Chemistry and Molecular Engineering, Zhengzhou University, Zhengzhou 450052, Henan, P. R. China.

### 1. General

### 2. Materials

### 3. Preparation of complex 1

### 4. <sup>1</sup>H NMR spectra of compounds

### 5. <sup>13</sup>C NMR spectra of compounds

### 6. COSY and NOESY NMR spectra of complex

### 7. DOSY NMR spectra of complex

### 8. ESI-MS spectra of complex of 1+CB[8]

### 9. UV-vis Absorbance Spectra of complex 1 with CB[8]

## 1. General

$^1\text{H}$  NMR spectra were obtained on a Bruker AVANCE III 400 MHz spectrometer. High Resolution Mass Spectrometry (HRMS) was detected on a Agilent 6540 Q-TOF spectrometer. UV-vis Absorbance Spectra were measured on a Agilent 8453 UV-vis spectrometer. The irradiation was achieved with light from a SONY Multimedia Mobile LCD Projector. Electrochemical experiments were carried out using RST 5000 Electrochemical analyzer. Melting points were measured with an SGWX-4 microscopic apparatus without revision of the thermometer .

## 2. Materials

All materials and solvents employed were commercially available and used as supplied without purification.

## 3. Preparation of complex 1

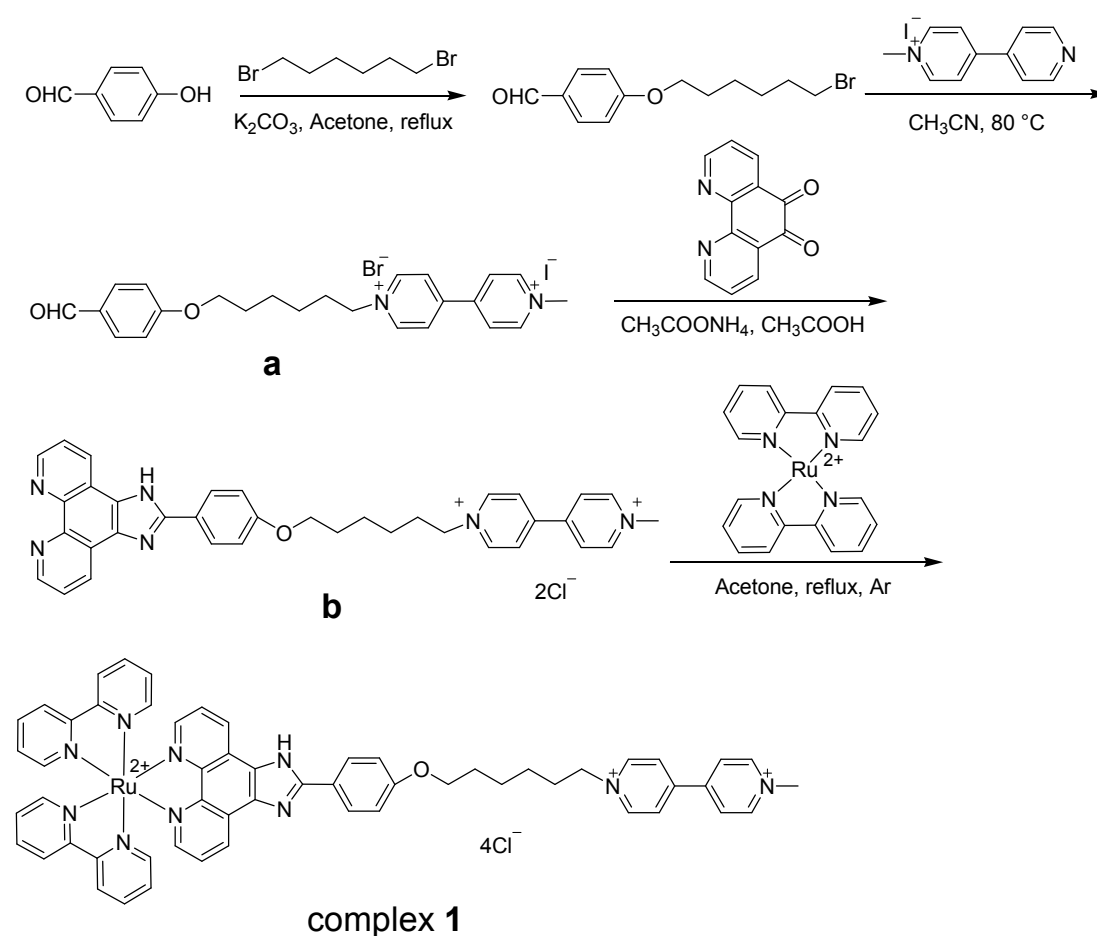

**Scheme S1.** The synthesis route of complex  $1\cdot 4\text{Cl}^-$

*Synthesis of 4-(6-Bromo-hexyloxy)-benzaldehyde*

To a suspension of  $K_2CO_3$  (834 mg, 6 mmol) in 20 mL freshly distilled acetone was added 4-hydroxybenzaldehyde (488 mg, 4 mmol) and 1,6-dibromo hexane (3 mL, 20 mmol) and the mixture was stirred at the reflux temperature for 3 h. After removal of the solid part by filtration, organic solvent was removed under reduced pressure. The crude product was dissolved in  $CHCl_3$  to extract it with water. Organic layer was evaporated and resulting residue chromatographed (10:1 Petroleum ether/EtOAc) to give 4-(6-Bromo-hexyloxy)-benzaldehyde as white solid (846 mg, yield 74%). mp: 39-40 °C.  $^1H$  NMR (400 MHz,  $CDCl_3$ )  $\delta$ : 9.88 (s, 1H), 7.84 (d,  $J=8.8$  Hz, 2H), 7.00 (d,  $J=8.8$  Hz, 2H), 4.05 (t,  $J=6.4$  Hz, 2H), 3.43 (t,  $J=6.8$  Hz, 2H), 1.94-1.87 (m, 2H), 1.87-1.80 (m, 2H), 1.56-1.49 (m, 4H).  $^{13}C$  NMR (100 MHz,  $CDCl_3$ , ppm):  $\delta$  190.7, 164.1, 131.9, 129.8, 114.7, 68.1, 33.7, 32.6, 28.8, 27.8, 25.2.

*Synthesis of 1-(6-(4-formylphenoxy)hexyl)-1'-methyl-[4,4'-bipyridine]-1,1'-dium(compound a)*

A solution of 4-(6-Bromo-hexyloxy)-benzaldehyde (570 mg, 2mmol) and N-methyl-4,4'-bipyridinium (890 mg, 3mmol) in  $CH_3CN$  (10 mL) was stirred at 80 °C for 2 days. After cooling to room temperature the solution was filtered to get a red precipitate **a** (748 mg, yield 63%)  $^1H$  NMR (400 MHz,  $D_2O$ )  $\delta$ : 9.57 (s, 1H), 9.04 (d,  $J=6.6$  Hz, 2H), 8.98 (d,  $J=6.6$  Hz, 2H), 8.41 (m, 4H), 7.66 (d,  $J=8.6$  Hz, 2H), 6.88 (d,  $J=8.6$  Hz, 2H), 4.66 (t,  $J=7.1$  Hz, 2H), 4.44 (s, 3H), 3.93 (t,  $J=6.1$  Hz, 2H), 2.05-1.98 (m, 2H), 1.68-1.63 (m, 2H), 1.44-1.37 (m, 2H), 1.35-1.32 (m, 2H).  $^{13}C$  NMR (100 MHz,  $D_2O$ , ppm):  $\delta$  194.5, 164.2, 149.6, 149.4, 146.3, 145.4, 132.7, 128.8, 126.9, 126.6, 115.1, 68.5, 62.0, 48.4, 30.3, 27.8, 24.7, 24.6. HRMS (ESI,  $m/z$ ): calcd for  $C_{24}H_{28}BrIN_2O_2$  [M-I-Br+e] $^+$ : 376.2140, found 376.2141

*Synthesis of 1-(6-(4-(1H-imidazo[4,5-f][1,10]phenanthrolin-2-yl)phenoxy)hexyl)-1'-methyl-[4,4'-bipyridine]-1,1'-dium(compound b)*

A solution of 1,10-phenanthroline-5,6-dione (0.21 g, 1.0 mmol), compound **a** (0.70 g, 1.2 mmol), and ammonium acetate (1.9 g, 25 mmol) in glacial acetic acid (10 mL)

was refluxed for 3 h, After cooling to room temperature, the cooled deep red solution was diluted with 25 mL water and neutralized with ammonium hydroxide. Then, excessive  $\text{NH}_4\text{PF}_6$  was added to the solution to give a precipitate of the product which was filtered, washed with water and purified by column chromatography (10:1:1 MeCN:H<sub>2</sub>O: Sat. KNO<sub>3</sub>). The principal band was collected, and the counteranion exchanged with  $\text{NH}_4\text{PF}_6$  to get **b**· $2\text{PF}_6^-$  (385 mg, 45 %). After ion exchange the product was collected as a red powder **b**· $2\text{Cl}^-$ . <sup>1</sup>H NMR (400 MHz, D<sub>2</sub>O, ppm):  $\delta$  8.78 (d,  $J=6.2$  Hz, 2H), 8.49 (br, 2H), 8.20 (d,  $J=6$  Hz, 2H), 8.02 (d,  $J=6.2$  Hz, 2H), 7.87 (br, 2H), 7.81 (d,  $J=6$  Hz, 2H), 7.25 (br, 4H), 6.66 (br, 2H), 4.43 (t,  $J=6.9$  Hz, 2H), 3.94 (br, 2H), 3.75 (s, 3H), 1.82 (br, 2H), 1.68 (br, 2H), 1.44 (br, 2H), 1.30 (br, 2H). <sup>13</sup>C NMR (100 MHz, D<sub>2</sub>O, ppm):  $\delta$  158.9, 149.8, 148.5, 148.1, 146.7, 145.5, 145.0, 139.9, 129.5, 127.2, 126.1, 125.5, 123.3, 119.9, 114.6, 67.8, 61.7, 48.0, 30.1, 27.5, 24.9, 24.2. HRMS (ESI,  $m/z$ ): calcd for C<sub>36</sub>H<sub>34</sub>Cl<sub>2</sub>N<sub>6</sub>O [M-2Cl]<sup>2+</sup>: 283.1392, found 283.1397

#### *Synthesis of complex 1*

The cis-Ru(bpy)<sub>2</sub>Cl<sub>2</sub> (52 mg, 0.10 mmol) was dissolved in acetone (5 mL) with AgPF<sub>6</sub> (50 mg, 0.2 mmol) for 8 h. The solution was filtered and washed with acetone (10mL) into a 25 mL round bottom flask containing the crude product **b**· $2\text{PF}_6^-$ . The mixture was refluxed under Ar for 2 days. After removal of the acetone the pure compound was obtained by subsequent purification by silica column with a 10:1:1 in MeCN: H<sub>2</sub>O: KNO<sub>3</sub> Sat. H<sub>2</sub>O. Ion exchange to Cl<sup>-</sup> ions yielded the final product **1** (43 mg, 38.4%). <sup>1</sup>H NMR (400 MHz, D<sub>2</sub>O, ppm):  $\delta$  9.00 (d,  $J = 6.8$  Hz, 2H), 8.82 (d,  $J = 6.4$  Hz, 2H), 8.73 (d,  $J = 8.6$  Hz, 2H), 8.45-8.50 (m, 4H), 8.38 (d,  $J = 6.8$  Hz, 2H), 8.34 (d,  $J = 6.4$  Hz, 2H), 8.03 (d,  $J = 4.6$  Hz, 2H), 7.97-8.01 (m, 2H), 7.88-7.92 ( m, 2H), 7.84 (d,  $J = 5.4$  Hz, 2H), 7.68 (br 2H), 7.62-7.65 (m, 4H), 7.31-7.34 (m, 2H), 7.14-7.18 (m, 2H), 6.53 (br, 2H), 4.64 ( 2H), 4.16 (s, 3H), 3.69 (br, 1H ), 3.59 (br, 1H ), 1.98-2.05 (m, 2H), 1.55 (br, 2H), 1.33 (br, 4H). <sup>13</sup>C NMR (100 MHz, D<sub>2</sub>O, ppm):  $\delta$  158.9, 157.2, 156.9, 151.7, 151.0, 150.0, 149.8, 149.6, 146.2, 145.4, 145.0, 137.9, 137.8, 130.4, 130.1, 127.6, 127.5, 127.0, 126.8, 126.6, 125.5, 124.2, 124.0, 122.4,

119.0, 113.1, 66.9, 61.9, 48.2, 30.6, 28.0, 25.4, 24.8. HRMS (ESI,  $m/z$ ): calcd for  $C_{56}H_{50}Cl_4N_{10}ORu$  [ $M-4Cl-H^+$ ] $^{3+}$ : 326.4400, found 326.4381

#### 4. $^1H$ NMR spectra of compounds

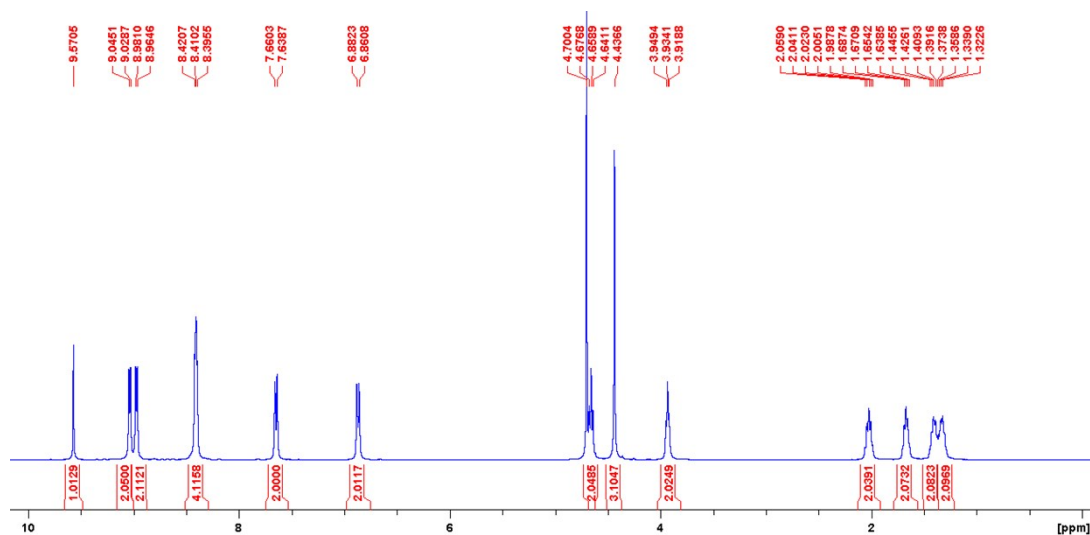

Figure S1.  $^1H$  NMR spectra (400 MHz,  $D_2O$ ) of compound **a**

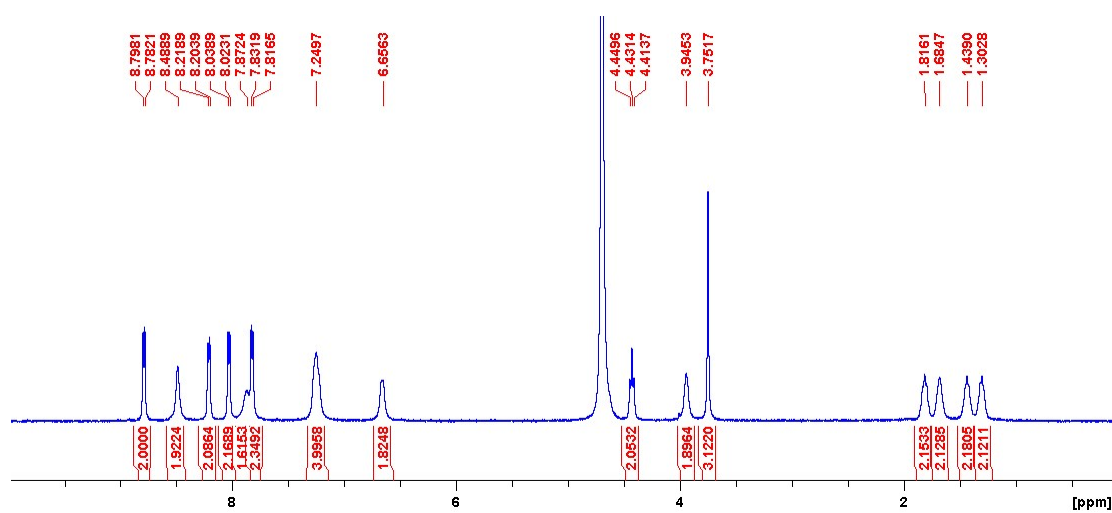

Figure S2.  $^1H$  NMR spectra (400 MHz,  $D_2O$ ) of compound **b**

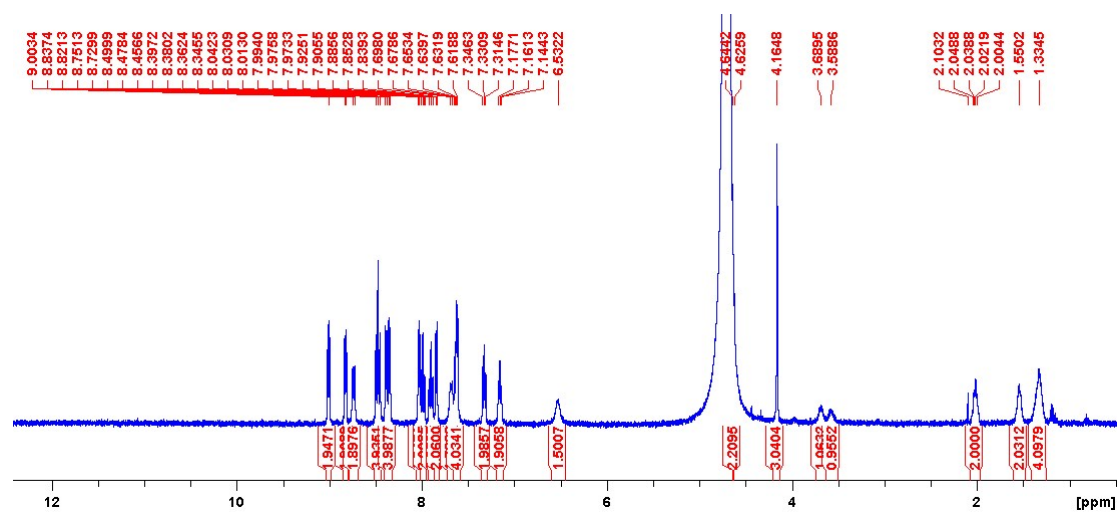

Figure S3.  $^1\text{H}$  NMR spectra (400 MHz,  $\text{D}_2\text{O}$ ) of complex 1

### 5. $^{13}\text{C}$ NMR spectra of compounds

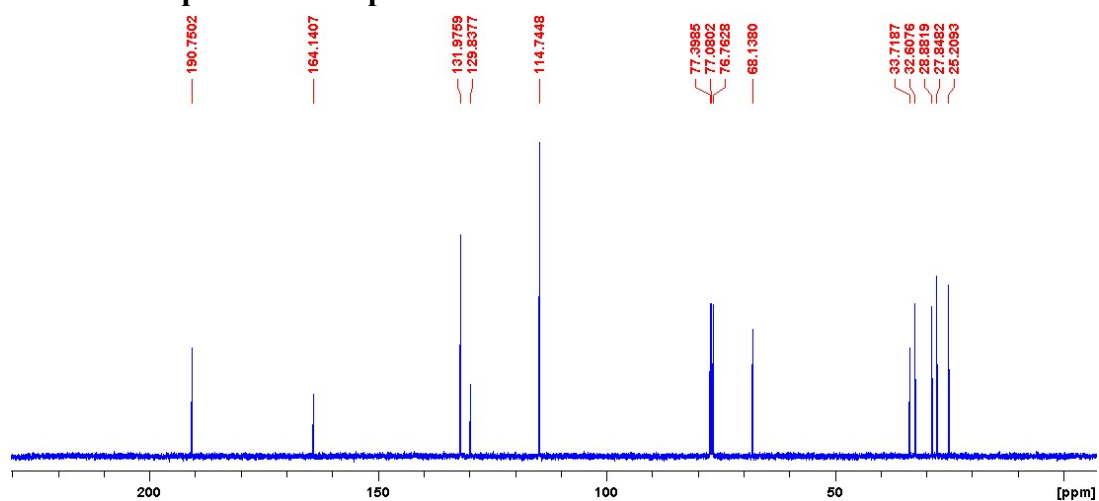

Figure S4.  $^{13}\text{C}$  NMR spectra (100 MHz,  $\text{CDCl}_3$ ) of 4-(6-Bromo-hexyloxy)-benzaldehyde

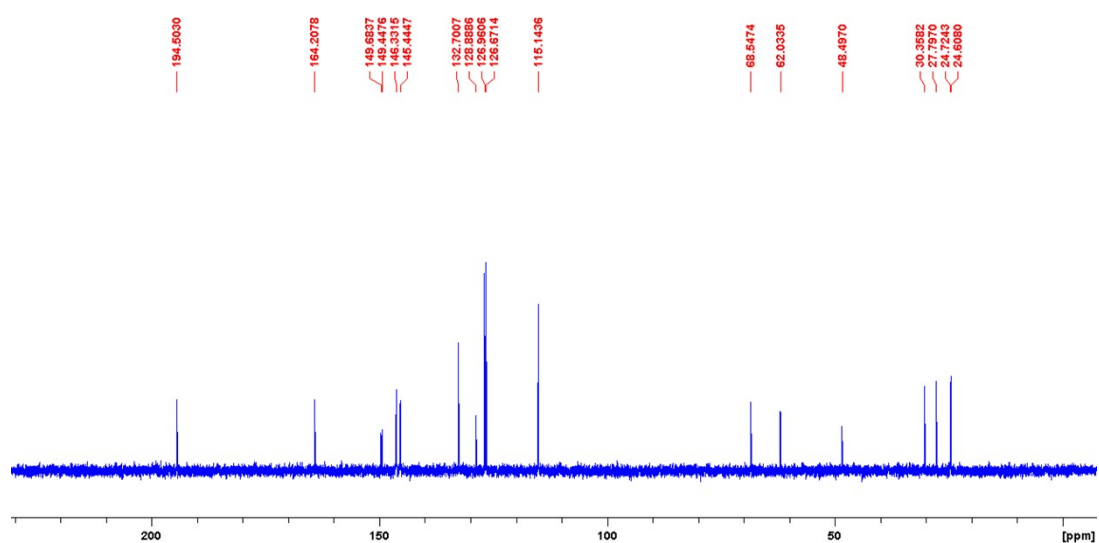

Figure S5.  $^{13}\text{C}$  NMR spectra (100 MHz,  $\text{D}_2\text{O}$ ) of compound a

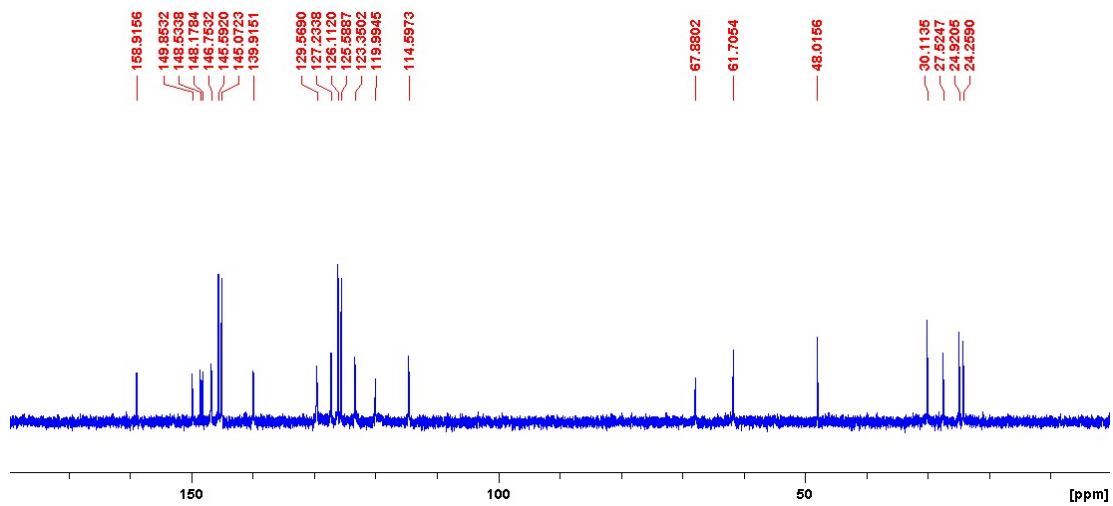

**Figure S6.**  $^{13}\text{C}$  NMR spectra (100 MHz,  $\text{D}_2\text{O}$ ) of compound **b**

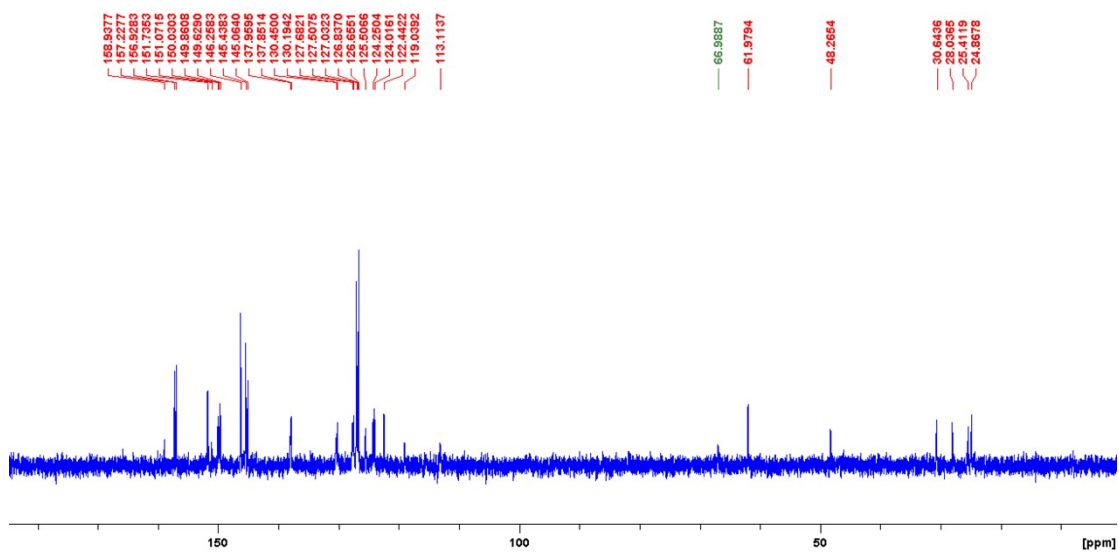

**Figure S7.**  $^{13}\text{C}$  NMR spectra (100 MHz,  $\text{D}_2\text{O}$ ) of complex **1**

## 6. COSY and NOESY NMR spectra of complex

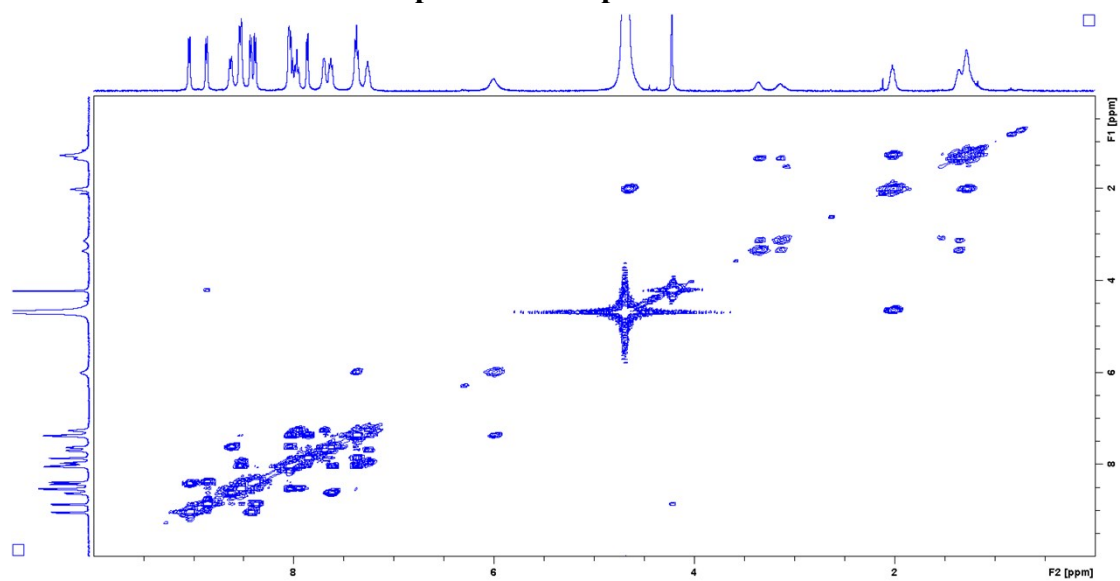

**Figure S8.**  $^1\text{H}$ - $^1\text{H}$  COSY spectra (400 MHz,  $\text{D}_2\text{O}$ ) of complex **1**

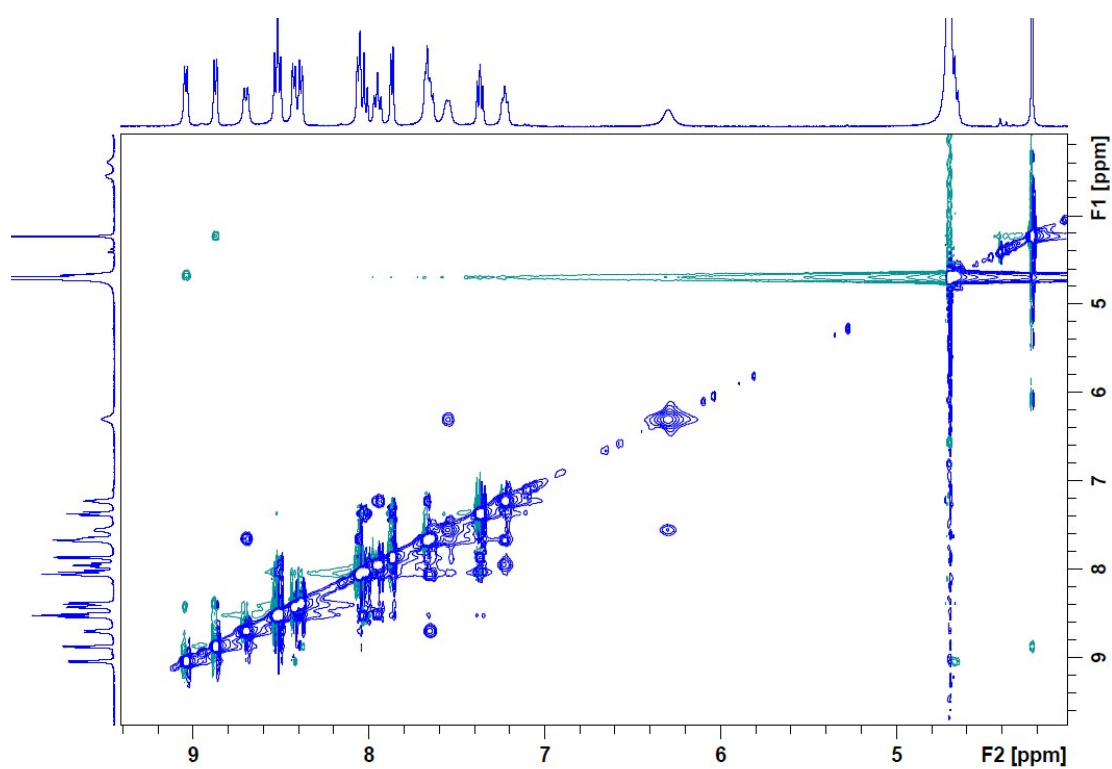

**Figure S9.** Partial  $^1\text{H}$ - $^1\text{H}$  NOESY spectrum of complex **1** in  $\text{D}_2\text{O}$  at 298 K.



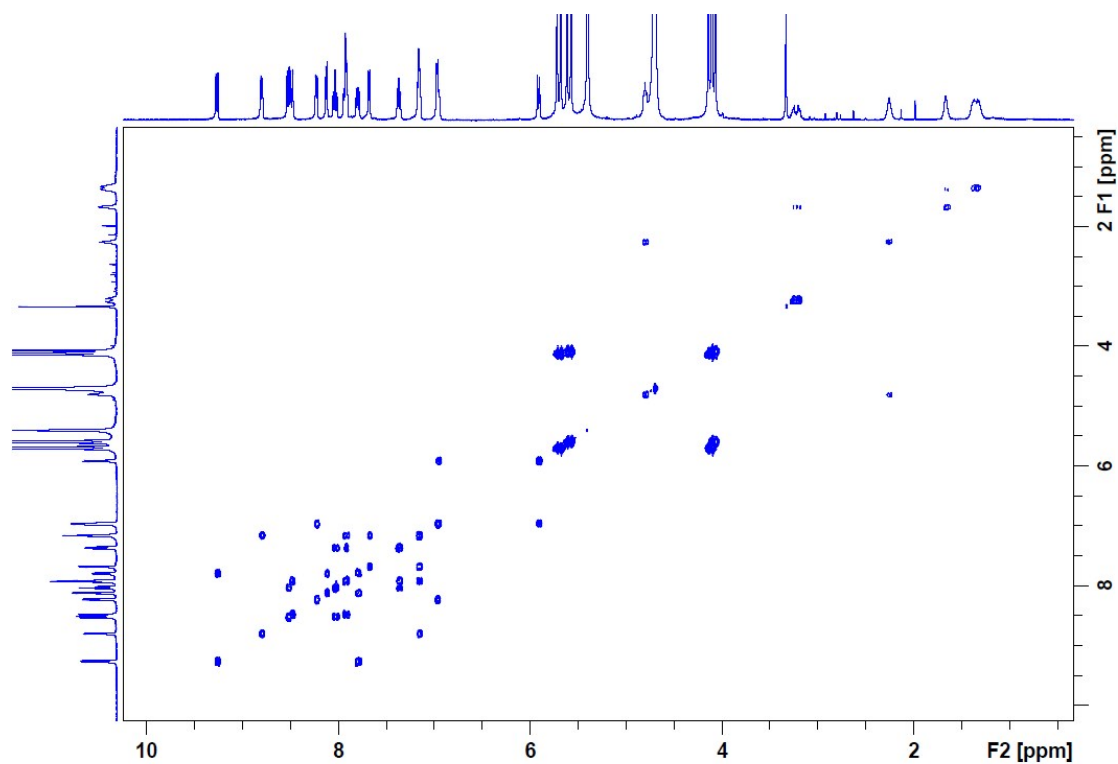

**Figure S10.**  $^1\text{H}$ - $^1\text{H}$  COSY spectra (400 MHz,  $\text{D}_2\text{O}$ ) of complex **1**+**CB[8]**

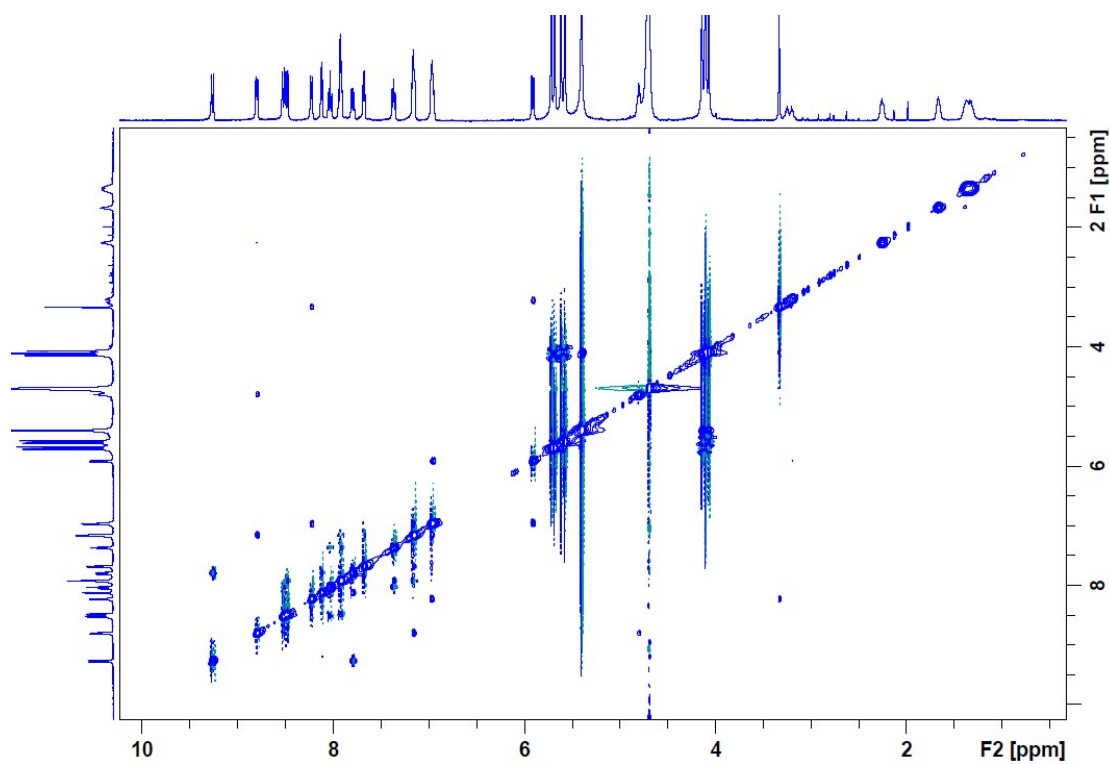

**Figure S11.**  $^1\text{H}$ - $^1\text{H}$  NOESY spectrum of complex **1**+**CB[8]** in  $\text{D}_2\text{O}$  at 298 K.

## 7. DOSY NMR spectra of complexes

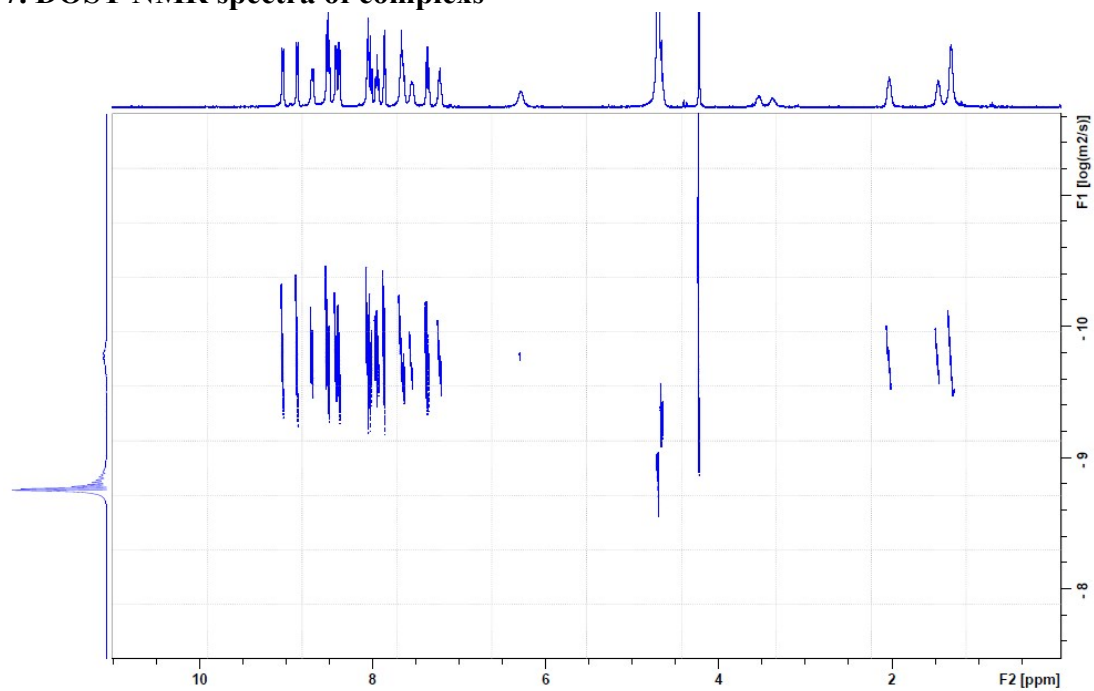

**Figure S12.** DOSY-NMR spectrum (400 MHz, D<sub>2</sub>O, 298 K) of complex **1**, plotted using the log values of the diffusion constant.

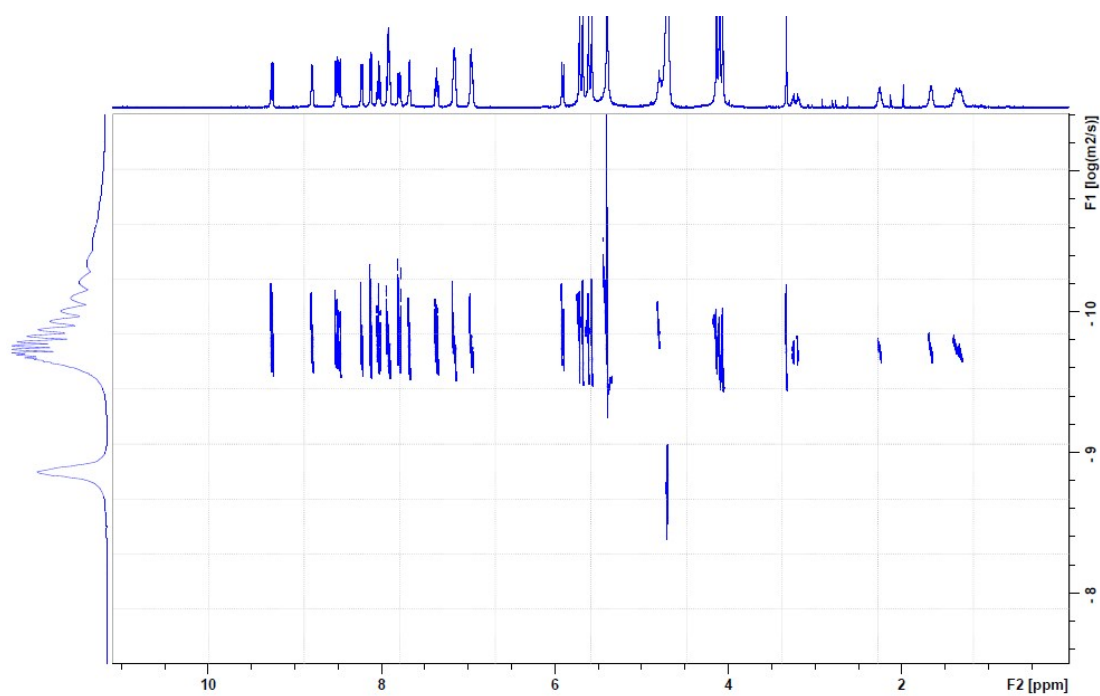

**Figure S13.** DOSY-NMR spectrum (400 MHz, D<sub>2</sub>O, 298 K) of complex **1+CB[8]**, plotted using the log values of the diffusion constant.

**Table S1.** Diffusion coefficients (D) obtained from DOSY measurements

| Complex        | Diffusion coefficient ( $\text{m}^2 \text{s}^{-1}$ ) |
|----------------|------------------------------------------------------|
| <b>1</b>       | $1.70 \times 10^{-10}$                               |
| <b>1+CB[8]</b> | $1.55 \times 10^{-10}$                               |

### 8. ESI-MS spectra of complex of 1–CB[8]

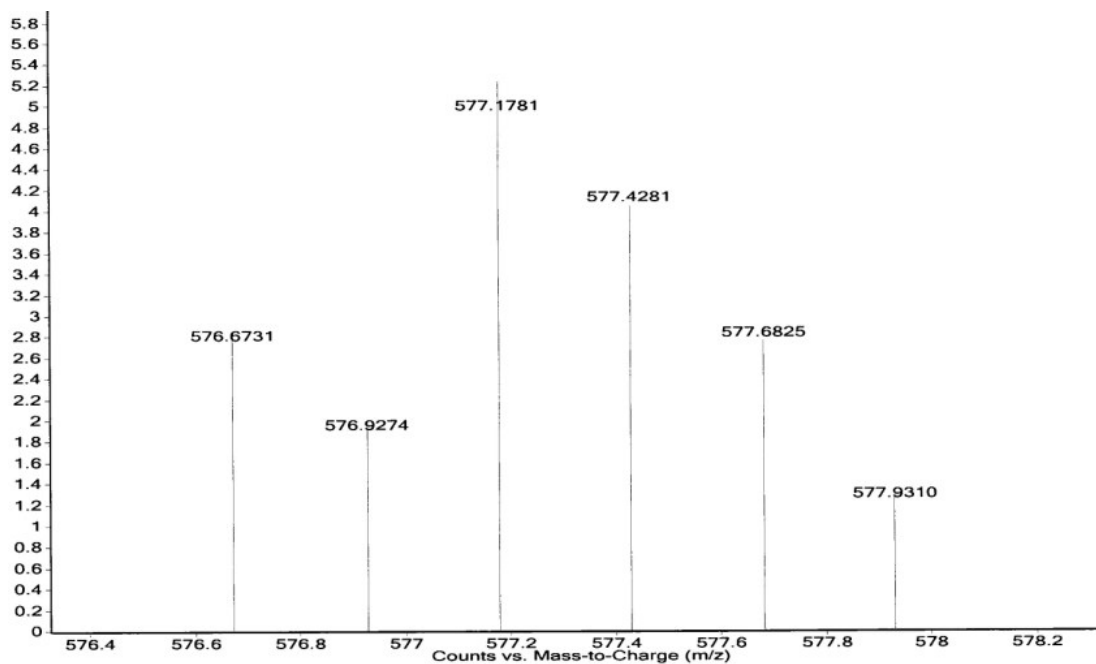

**Figure S14.** ESI-MS spectra of 1: 1 inclusion complex of **1+CB[8]** (calculated for  $[\mathbf{1} + \text{CB}[8] - 4\text{Cl}^-]^{4+}$ , 577.1779).

### 9. UV-vis Absorbance Spectra of complex 1 with CB[8]

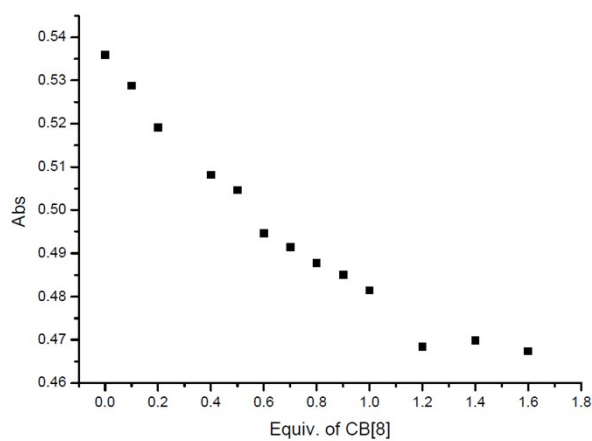

**Figure S15.** UV-vis titration curve at 284 nm versus equivalents of CB[8].
